# Supplementary material
Source: PubMed Central journal article supplement (PMC3276479)
Supplement: supp_M020404_jlr.M020404-1.pdf [file supp_M020404_jlr.M020404-1.pdf]

**Supplemental Figure 1. Linkage disequilibrium structure of the *LPL* gene on chromosome 8 in the study population**

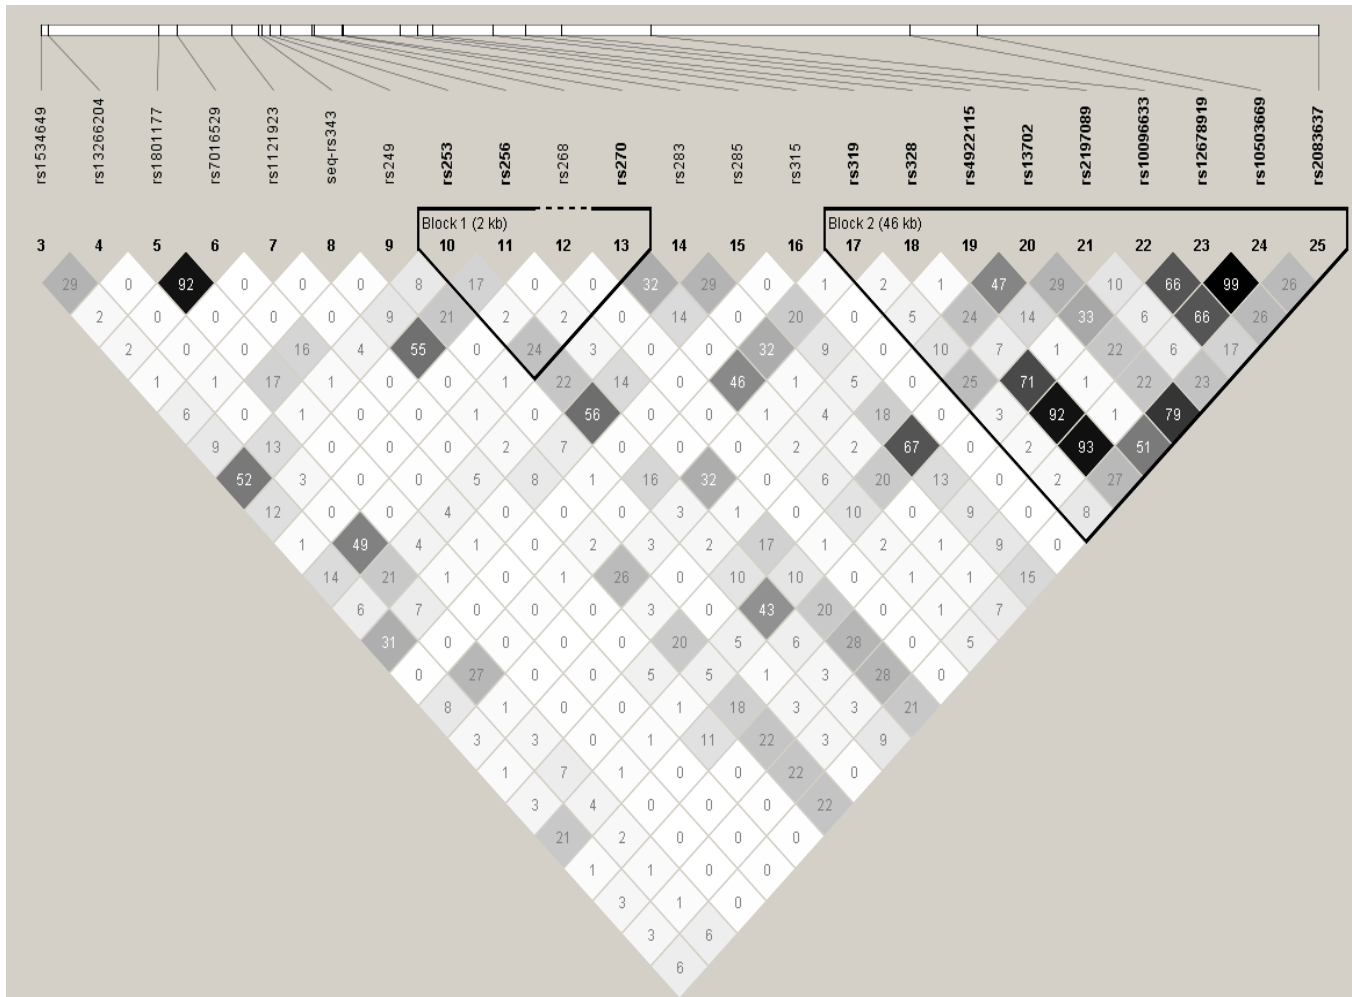

**Supplemental Table 1: ANOVA for baseline HDL-C and TG levels across genotypes for the FA–statin combination therapy group**

| <b>SNP</b>         | <b>Homozygous</b> | <b>Heterozygous</b> | <b>Wild-type</b> | <b>P*</b>   |
|--------------------|-------------------|---------------------|------------------|-------------|
| <b>rs1801177</b>   | <b>A/A</b>        | <b>G/A</b>          | <b>G/G</b>       |             |
| Mean TG (mg/dL)    | NI                | 235                 | 286              | <b>0.18</b> |
| Mean HDL-C (mg/dL) | NI                | 37.8                | 38.2             | <b>0.8</b>  |
| <b>rs7016529</b>   | <b>G/G</b>        | <b>G/A</b>          | <b>A/A</b>       |             |
| Mean TG (mg/dL)    | NI                | 239                 | 285              | <b>0.45</b> |
| Mean HDL-C (mg/dL) | NI                | 37.6                | 38.2             | <b>0.3</b>  |
| <b>rs249</b>       | <b>G/G</b>        | <b>G/A</b>          | <b>A/A</b>       |             |
| Mean TG (mg/dL)    | NI                | 273                 | 286              | <b>0.53</b> |
| Mean HDL-C (mg/dL) | NI                | 38.2                | 38.2             | <b>0.98</b> |

\* Multiway ANOVA

NI, none identified in the study

**Supplemental Table 2: Association analyses for SNPs rs1801177, rs7016529, and rs249 in the FA–statin combination treatment group for percent change in HDL-C and TG using multivariate regression adjusted for age, sex, body mass index, smoking, baseline trait level, baseline TG level (for HDL-C), and diabetes status**

| Gene       | SNP       | MAF  | Minor allele | HDL-C |       | TG    |      |
|------------|-----------|------|--------------|-------|-------|-------|------|
|            |           |      |              | P     | Beta  | P     | Beta |
| <i>LPL</i> | rs1801177 | 2.0% | A            | 0.29  | −3.73 | 0.51  | 2.8  |
| <i>LPL</i> | rs7016529 | 2.1% | G            | 0.41  | −2.80 | 0.42  | 3.4  |
| <i>LPL</i> | rs249     | 7.5% | G            | 0.12  | −3.12 | 0.002 | 7.5  |

Based on NCBI Build 36.1; beta, beta coefficient; FA, fenofibric acid; MAF, minor allele frequency

**Supplemental Table 3: ANOVA for the mean percent change in HDL-C and TG across genotypes in the FA–statin combination therapy group**

| <b>SNP</b>            | <b>Homozygous</b> | <b>Heterozygous</b> | <b>Wild-type</b> | <b>P*</b>     |
|-----------------------|-------------------|---------------------|------------------|---------------|
| <b>rs1801177</b>      | <b>A/A</b>        | <b>G/A</b>          | <b>G/G</b>       |               |
| Mean TG change (%)    | NI                | -32.9               | -45.4            | <b>0.06</b>   |
| Mean change HDL-C (%) | NI                | 22                  | 25.7             | <b>0.06</b>   |
| <b>rs7016529</b>      | <b>G/G</b>        | <b>G/A</b>          | <b>A/A</b>       |               |
| Mean change TG (%)    | NI                | -34.4               | -45.3            | <b>0.2</b>    |
| Mean change HDL-C (%) | NI                | 20.5                | 21.5             | <b>0.15</b>   |
| <b>rs249</b>          | <b>G/G</b>        | <b>G/A</b>          | <b>A/A</b>       |               |
| Mean change TG (%)    | NI                | -34.0               | -46.9            | <b>0.0004</b> |
| Mean change HDL-C (%) | NI                | 19.6                | 21.8             | <b>0.09</b>   |

\* Multiway ANOVA

NI, none identified in the study

**Supplemental Table 4: Haplotypes composed of SNPs rs1801177, rs7016529, and rs249 and their associations with baseline HDL-C and TG levels in the group receiving FA-statin combination therapy, adjusted for age, sex, body mass index, smoking, and diabetes status**

| Haplotype | Frequency | HDL-C            |                      | TG               |                      |
|-----------|-----------|------------------|----------------------|------------------|----------------------|
|           |           | Beta coefficient | P for baseline level | Beta coefficient | P for baseline level |
| AGG       | 0.02      | 0.16             | 0.9                  | -21.6            | 0.44                 |
| GAG       | 0.06      | 0.08             | 0.9                  | -4.7             | 0.78                 |
| GAA       | 0.92      | 0.10             | 0.9                  | 9.7              | 0.50                 |

**Supplemental Table 5: Haplotypes composed of SNPs rs1801177, rs7016529, and rs249 and their associations with response of HDL-C and TG to FA–statin combination therapy, adjusted for age, sex, body mass index, smoking, and diabetes status**

| Haplotype | Frequency | HDL-C       |               | TG          |               |
|-----------|-----------|-------------|---------------|-------------|---------------|
|           |           | Beta        | P for percent | Beta        | P for percent |
|           |           | coefficient | change        | coefficient | change        |
| AGG       | 0.02      | -3.9        | 0.30          | 3.82        | 0.42          |
| GAG       | 0.06      | -2.7        | 0.25          | 8.10        | 0.005         |
| GAA       | 0.92      | 2.9         | 0.15          | -6.93       | 0.004         |
